# Supplementary material for: Agreement and reliability of the Feline Grimace Scale among cat owners, veterinarians, veterinary students and nurses
Source: PubMed Central journal article supplement (PMC7933168; doi:10.1038/s41598-021-84696-7), 2021-03-04
Supplement: 41598_2021_84696_MOESM1_ESM.pdf [file 41598_2021_84696_MOESM1_ESM.pdf]

**Supplementary material - Agreement and reliability of the Feline Grimace Scale among cat owners, veterinarians, veterinary students and nurses**

Authors: Marina C. Evangelista<sup>1</sup>, Paulo V. Steagall<sup>1</sup>

<sup>1</sup>Département de sciences cliniques, Faculté de médecine vétérinaire, Université de Montréal, 3200 rue Sicotte, Saint-Hyacinthe, Québec, J2S2M2, Canada

**Table S1. Inter-rater reliability of the Feline Grimace Scale using 100 images assessed by raters with different degrees of expertise in feline pain assessment**

|                           | <b>Group</b>  | <b>ICC single (95% CI)</b> | <b>ICC average (95% CI)</b> |
|---------------------------|---------------|----------------------------|-----------------------------|
| <b>FGS Final score</b>    | Owners        | 0.80 (0.74 to 0.85)        | 0.95 (0.93 to 0.97)         |
|                           | Students      | 0.88 (0.85 to 0.91)        | 0.97 (0.97 to 0.98)         |
|                           | Nurses        | 0.83 (0.79 to 0.88)        | 0.96 (0.95 to 0.97)         |
|                           | Veterinarians | 0.86 (0.81 to 0.90)        | 0.97 (0.95 to 0.98)         |
| <b>AU - Ears</b>          | Owners        | 0.76 (0.70 to 0.82)        | 0.94 (0.92 to 0.96)         |
|                           | Students      | 0.82 (0.76 to 0.86)        | 0.96 (0.94 to 0.97)         |
|                           | Nurses        | 0.80 (0.75 to 0.85)        | 0.95 (0.94 to 0.97)         |
|                           | Veterinarians | 0.82 (0.77 to 0.86)        | 0.96 (0.94 to 0.97)         |
| <b>AU - Eyes</b>          | Owners        | 0.86 (0.82 to 0.89)        | 0.97 (0.96 to 0.98)         |
|                           | Students      | 0.87 (0.83 to 0.90)        | 0.97 (0.96 to 0.98)         |
|                           | Nurses        | 0.78 (0.71 to 0.84)        | 0.95 (0.92 to 0.96)         |
|                           | Veterinarians | 0.80 (0.71 to 0.86)        | 0.95 (0.93 to 0.97)         |
| <b>AU - Muzzle</b>        | Owners        | 0.39 (0.29 to 0.49)        | 0.76 (0.68 to 0.83)         |
|                           | Students      | 0.62 (0.54 to 0.70)        | 0.89 (0.85 to 0.92)         |
|                           | Nurses        | 0.48 (0.36 to 0.59)        | 0.82 (0.74 to 0.88)         |
|                           | Veterinarians | 0.57 (0.47 to 0.66)        | 0.87 (0.82 to 0.91)         |
| <b>AU - Whiskers</b>      | Owners        | 0.47 (0.37 to 0.56)        | 0.81 (0.75 to 0.87)         |
|                           | Students      | 0.64 (0.56 to 0.72)        | 0.90 (0.86 to 0.93)         |
|                           | Nurses        | 0.56 (0.47 to 0.65)        | 0.87 (0.82 to 0.90)         |
|                           | Veterinarians | 0.60 (0.51 to 0.69)        | 0.88 (0.84 to 0.92)         |
| <b>AU - Head position</b> | Owners        | 0.66 (0.57 to 0.73)        | 0.91 (0.87 to 0.93)         |
|                           | Students      | 0.74 (0.67 to 0.80)        | 0.93 (0.91 to 0.95)         |
|                           | Nurses        | 0.80 (0.74 to 0.85)        | 0.95 (0.94 to 0.97)         |
|                           | Veterinarians | 0.78 (0.72 to 0.83)        | 0.95 (0.93 to 0.96)         |

Intraclass correlation coefficient (ICC) estimates and their 95% confidence intervals (95% CI) were calculated based on single measures (ICC single) and average (ICC average) of measures (raters: n = 5/group), using two-way random effects model for absolute agreement.

**Table S2. Intra-rater reliability of the Feline Grimace Scale using 10 images (repeated across two scoring sessions, one week apart) assessed by raters with different degrees of expertise in feline pain assessment**

|                           | <b>Group</b>  | <b>ICC single (95% CI)</b> | <b>ICC average (95% CI)</b> |
|---------------------------|---------------|----------------------------|-----------------------------|
| <b>FGS Final score</b>    | Owners        | 0.87 (0.75 to 0.93)        | 0.93 (0.86 to 0.97)         |
|                           | Students      | 0.91 (0.84 to 0.95)        | 0.95 (0.91 to 0.97)         |
|                           | Nurses        | 0.81 (0.69 to 0.89)        | 0.90 (0.82 to 0.94)         |
|                           | Veterinarians | 0.91 (0.85 to 0.95)        | 0.95 (0.92 to 0.97)         |
| <b>AU - Ears</b>          | Owners        | 0.85 (0.74 to 0.91)        | 0.92 (0.85 to 0.95)         |
|                           | Students      | 0.83 (0.72 to 0.90)        | 0.91 (0.83 to 0.95)         |
|                           | Nurses        | 0.83 (0.73 to 0.90)        | 0.91 (0.84 to 0.95)         |
|                           | Veterinarians | 0.87 (0.78 to 0.93)        | 0.93 (0.88 to 0.96)         |
| <b>AU - Eyes</b>          | Owners        | 0.92 (0.85 to 0.95)        | 0.96 (0.92 to 0.98)         |
|                           | Students      | 0.89 (0.81 to 0.93)        | 0.94 (0.89 to 0.97)         |
|                           | Nurses        | 0.76 (0.61 to 0.85)        | 0.86 (0.76 to 0.92)         |
|                           | Veterinarians | 0.93 (0.88 to 0.96)        | 0.96 (0.94 to 0.98)         |
| <b>AU - Muzzle</b>        | Owners        | 0.57 (0.34 to 0.73)        | 0.72 (0.50 to 0.84)         |
|                           | Students      | 0.71 (0.53 to 0.83)        | 0.83 (0.69 to 0.91)         |
|                           | Nurses        | 0.55 (0.31 to 0.72)        | 0.71 (0.48 to 0.84)         |
|                           | Veterinarians | 0.70 (0.51 to 0.82)        | 0.82 (0.68 to 0.90)         |
| <b>AU - Whiskers</b>      | Owners        | 0.68 (0.49 to 0.80)        | 0.81 (0.66 to 0.89)         |
|                           | Students      | 0.67 (0.48 to 0.80)        | 0.80 (0.65 to 0.89)         |
|                           | Nurses        | 0.55 (0.32 to 0.72)        | 0.71 (0.49 to 0.84)         |
|                           | Veterinarians | 0.57 (0.34 to 0.73)        | 0.73 (0.51 to 0.85)         |
| <b>AU - Head position</b> | Owners        | 0.79 (0.66 to 0.88)        | 0.88 (0.79 to 0.93)         |
|                           | Students      | 0.62 (0.42 to 0.76)        | 0.76 (0.59 to 0.87)         |
|                           | Nurses        | 0.66 (0.45 to 0.80)        | 0.79 (0.62 to 0.89)         |
|                           | Veterinarians | 0.69 (0.49 to 0.82)        | 0.81 (0.66 to 0.90)         |

Intraclass correlation coefficient (ICC) estimates and their 95% confidence intervals (95% CI) were calculated based on single measures (ICC single) and average (ICC average) of measures (raters: n = 5/group), using two-way mixed effects model for absolute agreement.
